RESEARCH ARTICLE

# Rapid on-site dual optical system to measure specific reactive oxygen species ( $O_2^{\cdot-}$ and $OCl^-$ ) in a tiny droplet of whole blood

Kimiko Kazumura<sup>1\*</sup>, Koza Takeuchi<sup>1</sup>, Akiko Hara<sup>1</sup>, Toshiyuki Miwa<sup>1</sup>, Masaki Hattori<sup>2</sup>, Yuqiu Wu<sup>3</sup>, Naokazu Morishita<sup>4</sup>, Hiroshi Tsuchiya<sup>1</sup>, Toshihiko Osawa<sup>5</sup>

**1** Central Research Laboratory, Hamamatsu Photonics K.K., Shizuoka, Japan, **2** Global Strategic Challenge Center, Hamamatsu Photonics K.K., Shizuoka, Japan, **3** Department of Research and Development, Healthcare Systems Co. Ltd., Aichi, Japan, **4** Electron Tube Division, Hamamatsu Photonics K.K., Shizuoka, Japan, **5** Department of Health and Nutrition, Faculty of Psychological and Physical Science, Aichi Gakuin University, Aichi, Japan

\* [kimiko-k@crl.hpk.co.jp](mailto:kimiko-k@crl.hpk.co.jp)

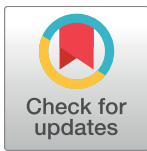

**OPEN ACCESS**

**Citation:** Kazumura K, Takeuchi K, Hara A, Miwa T, Hattori M, Wu Y, et al. (2018) Rapid on-site dual optical system to measure specific reactive oxygen species ( $O_2^{\cdot-}$  and  $OCl^-$ ) in a tiny droplet of whole blood. PLoS ONE 13(8): e0200573. <https://doi.org/10.1371/journal.pone.0200573>

**Editor:** Keiko Abe, The University of Tokyo, JAPAN

**Received:** May 8, 2018

**Accepted:** June 28, 2018

**Published:** August 1, 2018

**Copyright:** © 2018 Kazumura et al. This is an open access article distributed under the terms of the [Creative Commons Attribution License](https://creativecommons.org/licenses/by/4.0/), which permits unrestricted use, distribution, and reproduction in any medium, provided the original author and source are credited.

**Data Availability Statement:** All relevant data are within the paper and its Supporting Information files.

**Funding:** This work was supported by the Council for Science, Technology and Innovation (CSTI), Cross-ministerial Strategic Innovation Promotion Program (SIP), and “Technologies for creating next-generation agriculture, forestry and fisheries” (Funding agency: NARO Bio-oriented Technology Research Advancement Institution). KK, KT, AH, TM, MH, NM, and HT are employed by Hamamatsu Photonics K.K. YW is employed by Healthcare

## Abstract

Oxidative stress has been implicated in various disorders and controlling it would be important for healthy life. We have developed a new optical system for easily and accurately measuring oxidative stress in whole blood. It is optimized for simultaneously detecting reactive oxygen species (ROS) and highly reactive ROS (hROS), elicited mostly by white blood cells in a few microliters of blood. Results obtained by using this system show at least four important findings. 1) chemiluminescence of MCLA was confirmed to be attributable to  $O_2^{\cdot-}$ . 2) PMA-stimulated cells released  $O_2^{\cdot-}$  longer and more slowly than fMLP-stimulated ones. 3) fluorescence produced by APF oxidation was confirmed to be attributable to hROS, mostly  $OCl^-$ , produced by myeloperoxidase. 4) the generation of  $OCl^-$  was found to be a slower process than the  $O_2^{\cdot-}$  generation. We also conducted pilot studies of oxidative stress in healthy volunteers.

## Introduction

Oxidative stress is the term describing an imbalance between oxidant production, potentially leading to oxidative injury, and antioxidant capacity of the cells, bodily fluids and tissues [1,2]. Afterwards, the definition of oxidative stress has been re-defined as “an imbalance between oxidants and antioxidants in favor of the oxidants, leading to a disruption of the redox signaling and control, and/or molecular damage” [3]. Oxidative stress has been implicated in various diseases such as cardiovascular diseases, neurodegenerative disorders, cancer, renal and lung diseases [4,5]. Therefore, it is important to monitor thus produced oxidants, collectively called reactive oxygen species (ROS), at an early stage for preventing such diseases.

ROS are thought to be formed as an unwanted byproduct of aerobic metabolism but can also be produced at elevated rates under pathophysiological conditions [1–5]. In fact, all phagocytic cells, including white blood cells (WBC) have a well-characterized superoxide radical ( $O_2^{\cdot-}$ ) generating plasma membrane oxidase capable of producing the large amounts of ROS required for its function in host defense [6].  $O_2^{\cdot-}$  produced by WBC is immediately

Systems Co. Ltd. The funders had no role in study design, data collection and analysis, decision to publish, or preparation of the manuscript.

**Competing interests:** KK, KT, AH, TM, MH, NM, and HT are employed by Hamamatsu Photonics K.K. YW is employed by Healthcare Systems Co. Ltd. The funders had no role in study design, data collection and analysis, decision to publish, or preparation of the manuscript. This does not alter our adherence to PLOS ONE policies on sharing data and materials.

converted to hydrogen peroxide ( $H_2O_2$ ) by spontaneous disproportionation reactions [6].  $H_2O_2$  is then enzymatically converted to more reactive oxygen radicals including hypochlorite ions ( $OCl^-$ ) by myeloperoxidase (MPO) [6,7].

We noticed that both  $O_2^{\cdot-}$  and  $OCl^-$  can be measured simultaneously by modifying the previously developed system that can monitor generated  $O_2^{\cdot-}$  and intracellular  $Ca^{2+}$  concentrations [8–11], which lead us to develop a new system. The new system uses the same chemiluminescence (CL) probe of MCLA ( $CL_{MCLA}$ ) for  $O_2^{\cdot-}$  as before [12,13] while  $OCl^-$  is monitored as fluorescence (FL) by using APF ( $FL_{APF}$ ) [14].

Here we report about the improvements of the new system optimized for monitoring ROS in a small amount of whole blood (1.5–3  $\mu$ l). Among them, we would like to point out that the measuring liquid samples are formed as confined suspensions placed on a special glass slide, which enables optical path lengths short enough to suppress blood component light absorptions. The system performs the subsequent procedures semi-automatically after introduction of whole blood into it. We also show that the system was successfully applied to a pilot study of the effects of diet and exercise on the oxidative stress of volunteers.

## Materials and methods

### Reagents

Dimethyl sulfoxide (DMSO), N-formyl-methionyl-leucyl-phenylalanine (fMLP), 4-aminobenzoic acid hydrazide (ABAH), phorbol 12-myristate 13-acetate (PMA), hypoxanthine and xanthine oxidase were purchased from Sigma-Aldrich Japan (Tokyo, Japan). 2-Methyl-6-(4-methoxyphenyl)-3,7-dihydroimidazo [1,2-a] pyrazin-3-one hydrochloride (MCLA) was purchased from Tokyo Kasei (Tokyo, Japan). Superoxide dismutase (SOD) and sodium hypochlorite solution were purchased from Wako Pure Chemical Industries (Osaka, Japan). Aminophenyl fluorescein (APF) and hydroxyphenyl fluorescein (HPF) were purchased from GORYO Chemical (Sapporo, Japan).

fMLP (1 mM) and PMA (0.1 mM) were prepared by dissolving into DMSO and stored at  $-80^\circ C$  as stock solutions. They were diluted with Ringer-Hepes buffer (RH buffer: 154 mM NaCl, 5.6 mM KCl, and 10 mM Hepes, pH7.4) just prior to use: fMLP [1:3 (v/v)] and PMA [1:20 (v/v)]. ABAH, SOD and hypoxanthine were dissolved in RH buffer. Stock MCLA was dissolved in Milli-Q water and its concentration was adjusted according to the molar extinction coefficient after filtration.

### Whole blood collection

Blood were collected from the fingertips of volunteers using a lancet (Becton, Dickinson and Company, Franklin Lakes, NJ, USA or Nipro, Osaka, Japan) after informed consent was obtained. The blood were then preserved in BD Microtainer Tubes (Becton, Dickinson and Company, Franklin Lakes, NJ, USA) whose inside was coated by  $K_2EDTA$  to prevent blood coagulation. The blood samples were kept at room temperature and used within 2 hours after collection. All experiments involving blood collection were performed in full compliance with the guidelines of the Research Ethics Committee of the Hamamatsu Photonics K.K. and approved by the same committee under the number H-86(57).

### Isolation of neutrophils from whole blood

Neutrophils were isolated from whole blood using Mono-Poly resolving medium (DS Pharma Biomedical, Osaka, Japan) according to the manufacturer's instruction manual with slight modifications. Briefly, the volumes of both blood and the medium were scaled down.

Typically, a 525  $\mu\text{l}$  of anticoagulated blood was loaded on a 450  $\mu\text{l}$  of Mono-Poly resolving medium in a microcentrifuge tube (Thermo Fisher Scientific, Waltham, MA, USA). The blood sample was then centrifuged at  $400\times g$  for 20 min at room temperature using a swing rotor. Since the middle white layer in the centrifuged tube contains neutrophils, it was recovered carefully, washed once with 750  $\mu\text{l}$  of RH buffer, centrifuged again, and finally dissolved in cold RH buffer at  $4^{\circ}\text{C}$ .

### Neutrophil counting

Neutrophil counts in whole blood and that of the isolated cells were determined with Pentra MS CRP (Horiba, Kyoto, Japan) according to the manufacturer's instruction. The isolated fraction from the whole blood mainly contained neutrophils (average 73.23% out of 16 experiments). We double-checked the total number of isolated neutrophils by direct microscope observation.

### Cell culture

HL-60 cells, a human acute promyelocytic leukemia cell line, obtained from American Type Culture Collection (Manassas, VA, USA) were maintained and differentiated to neutrophil-like cells with DMSO as previously described [10,11,15]. The cells thus differentiated were suspended in RH buffer and kept at  $4^{\circ}\text{C}$  until measurement. The cells were counted by microscope observation with Trypan Blue staining.

### Monitoring procedure of CL and FL

Basically,  $\text{CL}_{\text{MCLA}}$  and  $\text{FL}_{\text{APF}}$  were simultaneously monitored in the following procedure (see also S1 Table) with the newly developed system (CFL-P2200, Hamamatsu Photonics K.K., Hamamatsu, Japan):

1. RH buffer containing 0.5  $\mu\text{M}$  MCLA, 10  $\mu\text{M}$  APF and 1 mM  $\text{CaCl}_2$  was pre-incubated on a dedicated glass slide.
2. Incubate for 2 minutes at  $37^{\circ}\text{C}$ .
3. For negative control samples, adding SOD and ABAH (please see next section) to the solution on the slide.
4. Adding 1.5~3  $\mu\text{l}$  of whole blood or suspension of  $1\times 10^4$  cells of isolated neutrophils, or  $2\times 10^4$  cells of cultured neutrophil-like cells to the solution.
5. Stirring the solution with gentle pipetting.
6. Setting the glass slide in the system.
7. Incubate for 30 seconds in the system.
8. Start the measurement.
9. Stimulation of the sample cells by adding fMLP or PMA automatically.
10. Simultaneous recording of  $\text{CL}_{\text{MCLA}}$  and  $\text{FL}_{\text{APF}}$ .
11. Data analysis by the dedicated software and Excel. Stimulant enhancements of the signals of  $\text{CL}_{\text{MCLA}}$  and  $\text{FL}_{\text{APF}}$  were determined by calculating the peak areas under the curves (AUC) [10,11].

## Modifying the concentrations of $O_2^{\cdot-}$ and $OCl^-$ in blood samples

SOD (9  $\mu\text{g}/\text{mL}$ ) was used as a scavenger of  $O_2^{\cdot-}$  [16–18] and ABAH (100  $\mu\text{M}$ ) was used as an MPO specific inhibitor [19,20].  $O_2^{\cdot-}$  was generated by adding xanthine oxidase (67 units) into blood samples containing hypoxanthine (0, 0.1 and 0.2 nM) [11].  $OCl^-$  was increased by injecting an appropriate amount of sodium hypochlorite solutions (6 different concentrations) to blood samples.

## Optical configuration of the system

$CL_{MCLA}$  and  $FL_{APF}$  were both detected by using a single photomultiplier tube (PMT; H10682-210, Hamamatsu Photonics K.K.; Fig 1A), with 480 nm excitation light (band-pass filter 480 nm, FWHM 10 nm), which is optimized for the FL reagent APF (Ex-Max 490nm). Further, we placed light emitting diodes (LED) as the excitation lights at the photodetector side (Fig 1A and Panel b in S1 Fig). Same as the previous system [10,11], the lens set was arranged in front of the PMT (Fig 1A). This lens set transmits  $FL_{APF}$  (Em-Max 515 nm) and  $CL_{MCLA}$  (Em-Max 465 nm). The band rejection filters (Fig 1A) were optimized for removing excitation light efficiently. The signal separation between  $FL_{APF}$  and  $CL_{MCLA}$  by using a single PMT was attained by repeating on/off of the excitation lights at a high speed, which was already used in the previous system [10,11].

## Blood sample holder

In order to ensure the stability of sample droplet shapes, the glass slide used in the newly developed CFL-P2200 has two circular areas (19 mm diameter) with printed rims made of a highly water-repellent material (a custom product by Matsunami Glass Ind., Ltd.). Fig 1A and Panel b in S1 Fig show that sample mixtures containing blood were spread over the predetermined areas on it. Since the signal crosstalks were suppressed effectively, two adjacent samples can be measured simultaneously (e.g., measuring a test and a control samples).

## Prevention of evaporation from thin sample suspensions set in the system chamber

Stirring and mixing are necessary for adding stimulants or for preventing blood cells from aggregation, but placing a magnetic bar into the thin sample suspensions in the system may disrupt the thin optical paths and interfere with the optical detection from below. So, as a means of mixing, we adopted air flows with the air-injecting nozzles placed above the samples (Fig 1A). For keeping the sample temperature at 37°C and preventing evaporation in thin samples under constant air flows, we used warmed air flows and installed a humidifier inside the sample holding chamber (100% humidity). The chamber was covered with rubber heaters which can automatically control the chamber temperature.

## Results

### Comparison of the cuvette-type cell and the thin suspensions on a glass slide

The previous system (CFL-C2000) [10,11] used a cuvette (10 mm square) as the sample container (Panel a in S1 Fig). However, such cuvettes loaded with colored samples containing light absorbing substances such as blood are susceptible to strong light absorptions. To circumvent this problem, we selected a glass slide as the sample holder in the new system (Panel

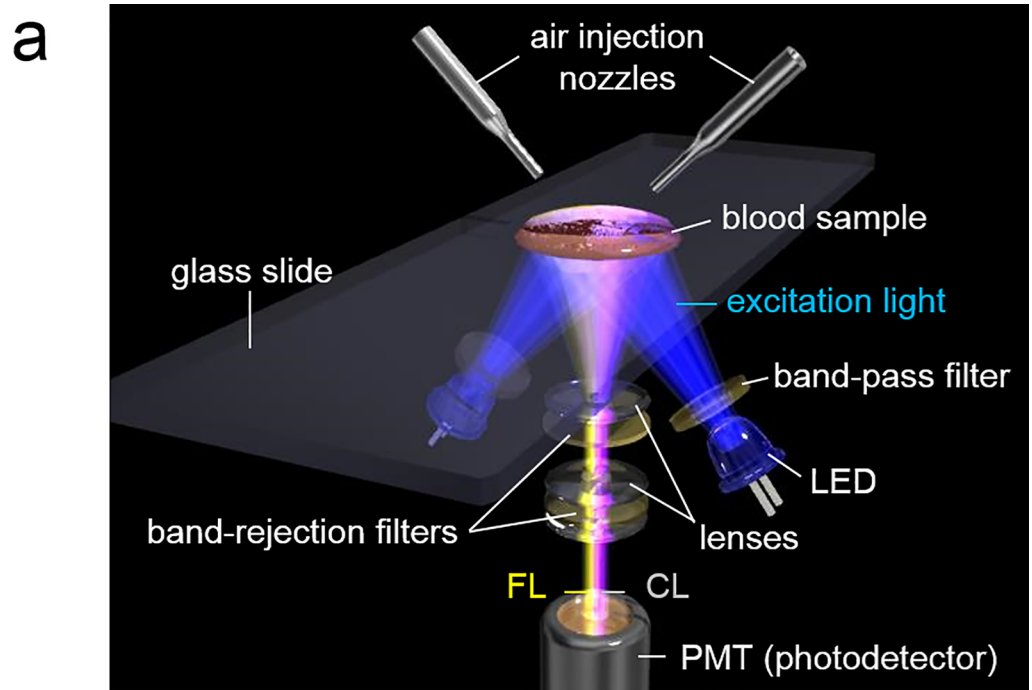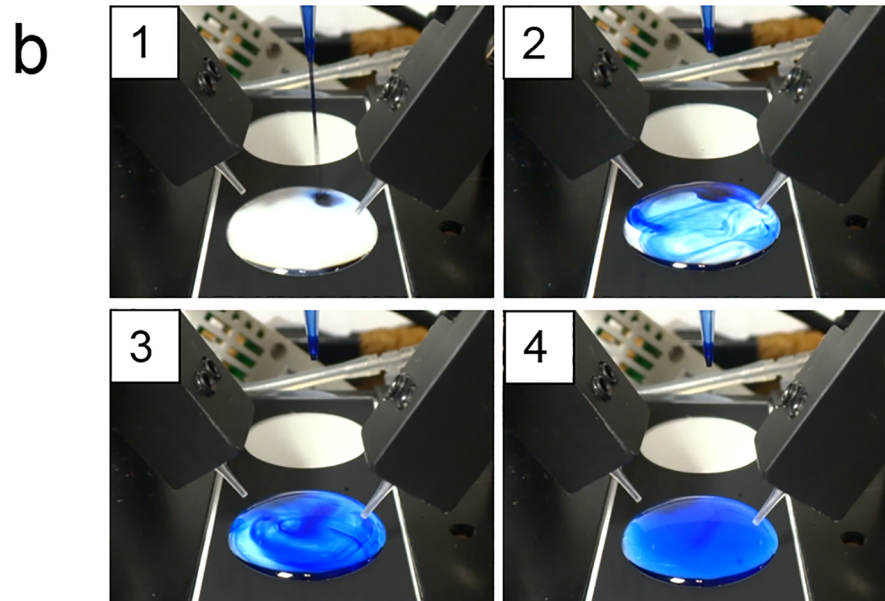

**Fig 1. The measuring system to detect  $CL_{MCLA}$  and  $FL_{APF}$  in a tiny droplet of whole blood.** (a) Schematic diagram of CFL-P2200. Detailed explanations of the system are described in the text. Dr. Hiroshi Satozono (Hamamatsu Photonics K.K.) helped us create this image. (b) Visualization of the stirring process by air flows using blue ink. Panels 1–4 show how dropped ink in liquid on a glass slide was diffused. The diffusion of ink was completed in about 2 seconds (panel 4, see also [S1 Movie](#)).

<https://doi.org/10.1371/journal.pone.0200573.g001>

b in [S1 Fig](#)). The optical path length of a sample placed on it becomes about one fourth shorter than that of the cuvettes.

To find out the improvements in optical signal strengths we compared the  $CL_{MCLA}$  data obtained with the previous (CFL-C2000, cuvette-type) and the new (CFL-P2200, glass slide-type) systems. The highest peak area of the  $CL_{MCLA}$  signals was obtained with 750-fold dilution of whole blood in cuvettes and the corresponding data of the samples on a glass slide was obtained with 500-fold dilution.

### Effects of air-flow stirring on solution mixing and CL/FL signals

For the air-flow stirring to work effectively and for obtaining a stable light signals, we carefully adjusted the amounts, the timings and the directions of the air flows. When the air flows were too strong, the  $FL_{APF}$  signal intensity fluctuated noticeably due to liquid surface disturbances. Conversely, absence of air flows or unsuitable directions resulted in erroneous measurements, due to insufficient diffusion of the added stimulant and blood cell aggregations (Panel c in [S2 Fig](#)). For fine-tuning the stirring efficiency, blue ink was used instead of the colorless reagents. The ink dropped into a sample liquid on a glass slide diffused evenly in about 2 seconds ([Fig 1B](#) and [S1 Movie](#)), indicating that the actual stimulants dropped into blood samples are mixed efficiently in a few seconds. Panel b in [S2 Fig](#) shows an outcome of the sample mixtures containing blood on a glass slide after a measurement, suggesting that they were sufficiently stirred by the air flows.

### Selectivity of MCLA, APF and HPF for monitoring $O_2^{\cdot-}$ and $OCI^-$

We used MCLA as a probe to measure extra-cellular  $O_2^{\cdot-}$  generated by NADPH oxidase in the cell membrane as previously reported [10]. MCLA is known to have a weak nonspecific luminescence derived from auto-oxidation with phosphate buffer [21]. To minimize the auto-oxidation, we used RH buffer in this system. For  $OCI^-$  detection, our first choice was APF, which is a fluorescence probe monitoring some of the highly reactive ROS (hROS) in a cumulative way. APF selectively and dose-dependently releases a strongly fluorescent compound, fluorescein, upon oxidation by hROS such as  $\cdot OH$ ,  $ONOO^-$  and  $OCI^-$ , but not by other ROS [14]. Another similar fluorescence probe HPF, which also releases fluorescein upon oxidation by  $\cdot OH$ ,  $ONOO^-$ , on the other hand, is not reactive to  $OCI^-$  [14]. Therefore,  $OCI^-$  can be specifically detected by using HPF and APF together [14]. We compared  $FL_{APF}$  and  $FL_{HPF}$  from isolated neutrophils. [S3 Fig](#) shows the net increases of both  $FL_{HPF}$  ( $\Delta HPF$ ) and  $FL_{APF}$  ( $\Delta APF$ ), which are FL subtractions of probe only in vehicle from probe in PMA-stimulated neutrophils. The FL increase of  $\Delta HPF$  was less than that of  $\Delta APF$  and AUC of the  $\Delta HPF$  was 90.7% less than that of the  $\Delta APF$ .

Next we measured  $CL_{MCLA}$  and  $FL_{APF}$  from neutrophil-like cells derived from cultured HL-60. [Fig 2A](#) shows that, soon after the stimulation (dotted line),  $CL_{MCLA}$  intensity was instantly increased and then immediately returned to the baseline level ([Fig 2A](#), black line). This pattern was almost the same as that previously described [10,11]. To find out whether or not the signal is attributable to the generated  $O_2^{\cdot-}$ , we scavenged  $O_2^{\cdot-}$  by adding SOD. Addition of three different concentrations of SOD significantly decreased the  $CL_{MCLA}$  intensity in a dose-dependent manner ([Fig 2A](#), blue and similar colored lines). In contrast to the transient nature of the  $CL_{MCLA}$ , the  $FL_{APF}$  intensity accumulated gradually by oxidation of APF ([Fig 2B](#), black line). Likewise, to find out whether or not this signal is attributable to  $OCI^-$  produced by MPO, we added ABAH as an MPO specific inhibitor [19,20]. Addition of three different concentrations of ABAH markedly decreased the  $FL_{APF}$  intensity in a dose-dependent manner as expected ([Fig 2B](#), red and similar colored lines).

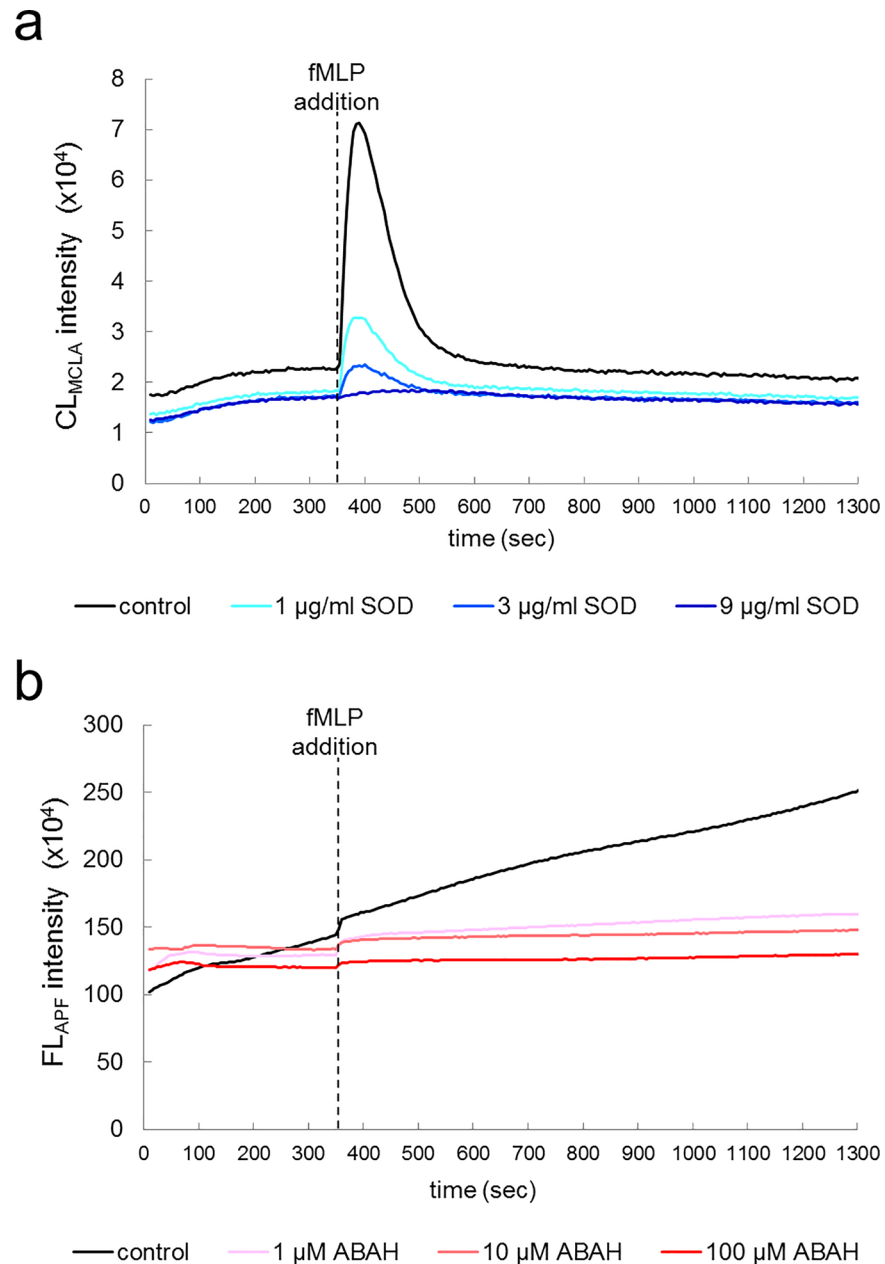

**Fig 2. Measurements of CL<sub>MCLA</sub> and FL<sub>APF</sub> in neutrophil-like cells.** Time courses of CL<sub>MCLA</sub> (a) and FL<sub>APF</sub> (b) from neutrophil-like cells. CFL-P2200 was used for the measurements. The cell mixtures were treated with control vehicle (black lines) or different concentrations of SOD (scavenger of O<sub>2</sub><sup>-</sup>, blue lines) and ABAH (inhibitor of MPO, red lines). fMLP was added at 350 second (dotted lines).

<https://doi.org/10.1371/journal.pone.0200573.g002>

### Measurements of CL<sub>MCLA</sub> and FL<sub>APF</sub> in a tiny droplet of whole blood

Next we measured CL<sub>MCLA</sub> and FL<sub>APF</sub> elicited by a droplet of whole blood. PMA was used as a stimulant instead of fMLP because PMA was found to be more effective for stimulating neutrophils than fMLP. Blood samples were collected from a volunteer's fingertip and kept at room temperature. They were then diluted into the reaction mixture before measurement as described in Materials and Methods and S1 Table. Fig 3A shows typical time courses of

$CL_{MCLA}$  (blue and pale blue lines) and  $FL_{APF}$  (red and pink lines), in which the left vertical axis indicates  $CL_{MCLA}$  intensity while the right vertical axis indicates  $FL_{APF}$  intensity.  $CL_{MCLA}$  slowly started to increase at around 90 seconds after PMA stimulation and then decreased gradually (Fig 3A, blue line). We could confirm that this increase corresponded to the  $O_2^{\cdot -}$  generated in the blood samples by observing  $CL_{MCLA}$  in the presence of SOD [16–18] (Fig 3A, pale blue line). On the other hand, the continuous increase of  $FL_{APF}$  started at around 320 seconds after PMA stimulation, which shows that  $FL_{APF}$  increase started at about the peak point of  $CL_{MCLA}$  (Fig 3A, red

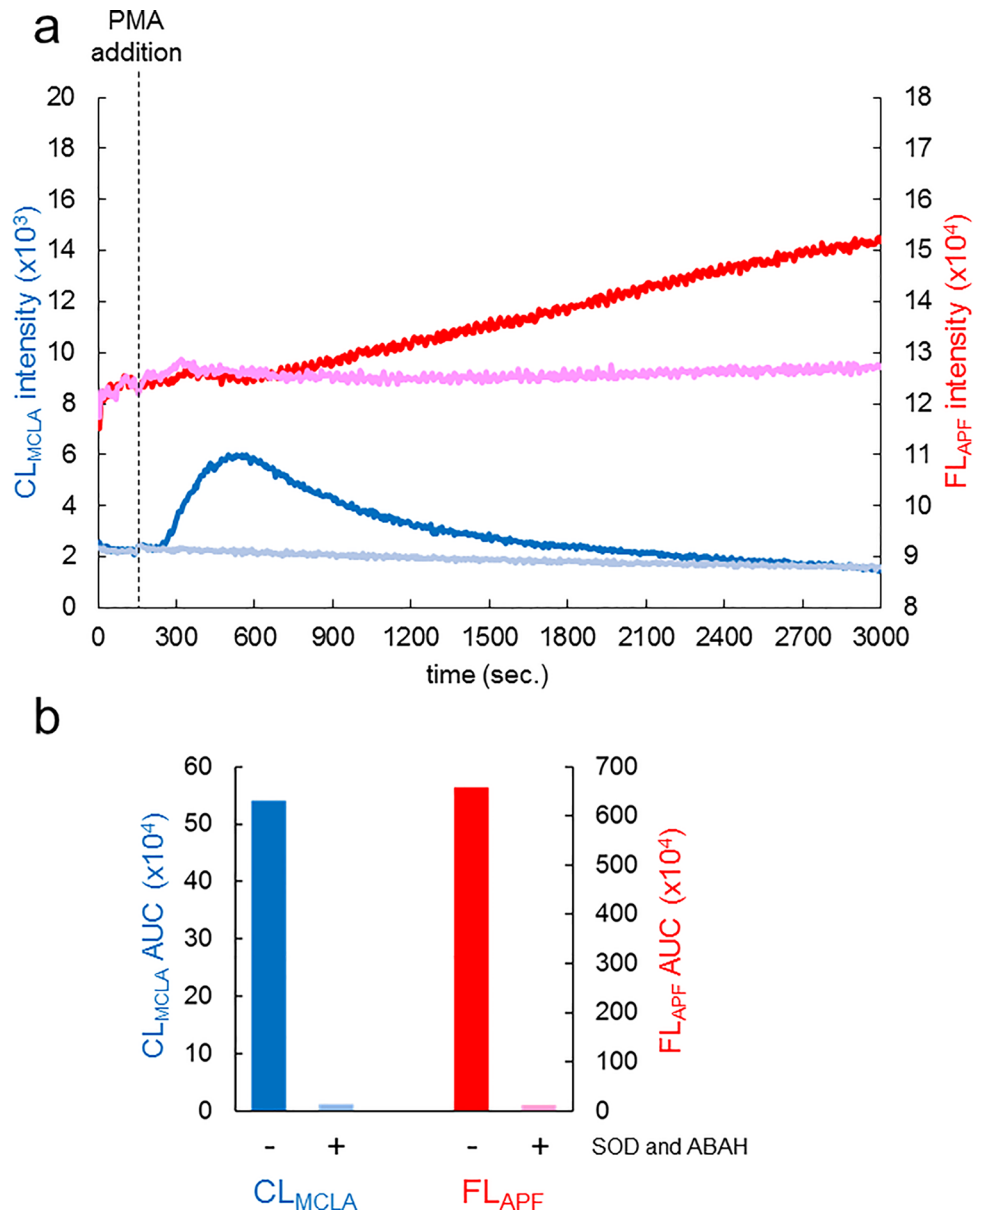

**Fig 3. Measurements of  $CL_{MCLA}$  and  $FL_{APF}$  in whole blood.** (a) Time courses of  $CL_{MCLA}$  and  $FL_{APF}$  in whole blood. CFL-P2200 was used for the measurements. The left vertical axis indicates  $CL_{MCLA}$  intensity; the right vertical axis,  $FL_{APF}$  intensity. The cell mixtures were treated with control vehicle (blue line for CL, red line for FL) or SOD and ABAH (pale blue line for CL with SOD, pink line for FL with ABAH). PMA was added at 150 second (dotted line). The baseline heights of  $FL_{APF}$  signals were adjusted for both the test sample (red line) and the sample including ABAH (pale pink line) making them start at the same level. (b) Calculated signal areas measured in (a). Increases in both  $CL_{MCLA}$  and  $FL_{APF}$  were determined by calculating AUCs.

<https://doi.org/10.1371/journal.pone.0200573.g003>



line). ABAH inhibition experiments confirmed that  $FL_{APF}$  was attributable to  $OCl^-$  [19,20]. The ABAH suppression became noticeable at about 600 seconds (Fig 3A, pale pink line). Next, we calculated AUCs of CL and FL of these experiments, which shows that AUC of  $CL_{MCLA}$  in the presence of SOD was 97.9% less than that without it (Fig 3B, left columns) and AUC of  $FL_{APF}$  in the presence of ABAH was 98.3% less than that without it (Fig 3B, right columns).

We then tested whether or not  $CL_{MCLA}$  signal can be increased when  $O_2^{\cdot -}$  are independently generated in blood samples by using the hypoxanthine xanthine oxidase mechanism [10,11] (Panel a in S4 Fig). When xanthine oxidase together with different concentrations of hypoxanthine was injected to the blood samples, the  $CL_{MCLA}$  signals were increased in a dose dependent manner (Panel a in S4 Fig, columns 4 and 5). Surprisingly, the notable  $CL_{MCLA}$  signal was detected when only xanthine oxidase was injected to the samples without hypoxanthine (Panel a in S4 Fig, column 3), which suggests that some amount of hypoxanthine was already in the blood samples. We also added  $OCl^-$  to blood samples and confirmed that the  $FL_{APF}$  signal was proportionally increased with added  $OCl^-$  concentrations and a clear linear correlation was found in the  $FL_{APF}$  signals (Panel b in S4 Fig,  $R = 0.998$ ).

### Reproducibility of $CL_{MCLA}$ and $FL_{APF}$ measurements in blood samples

Next we tested reproducibility of data with four different blood samples from a single volunteer preserved at room temperature in BD Microtainer Tube (see Materials and Methods; all blood samples in this experiment were measured within two hours after collection). Fig 4A shows time courses of  $CL_{MCLA}$  (blue and pale blue lines) and  $FL_{APF}$  (red and pink lines). The line color brightness indicates the order of measurement (the brightest is the latest). The reproducibility was so good that all four time courses almost overlapped with each other (Fig 4A). We calculated all four AUCs of  $CL_{MCLA}$  and  $FL_{APF}$ . The relative errors of the four measurements were 7.94% for  $FL_{APF}$  and 7.06% for  $CL_{MCLA}$  (Fig 4B).

### Correlation analysis of the neutrophil data sets

We then performed correlation analysis of  $CL_{MCLA}$  and  $FL_{APF}$  of whole blood samples from three healthy volunteers. The analysis was focused on the following three perspectives, (1) intensity (the area of increased  $CL_{MCLA}$  or  $FL_{APF}$ ) obtained from the whole blood samples, (2) intensity obtained from isolated neutrophils in the blood samples and (3) the concentration of the neutrophils in them. Blood samples from the three healthy volunteers were collected after fasting for 12 hours and then neutrophils were isolated as described in Materials and Methods. Neutrophil concentrations in the blood samples were determined by the conventional method (see Materials and Methods). First, we tested correlations between the whole blood samples and the isolated neutrophils. We measured  $CL_{MCLA}$  and  $FL_{APF}$  using the same amount of the whole blood (3  $\mu$ l) or the same number of isolated neutrophils ( $1 \times 10^4$  cells) obtained from the volunteers. Fig 5A and 5B show their scatter plots, which shows correlations between the intensities obtained from the whole blood (horizontal axis) and those from the isolated neutrophils (vertical axis). Clear linear correlations were found in both  $CL_{MCLA}$  (Fig 5A,  $R = 0.981$ ) and  $FL_{APF}$  (Fig 5B,  $R = 0.990$ ). We also examined whether or not the intensities obtained from the whole blood samples were correlated with the neutrophil concentrations in each of them. Fig 5C and 5D show scatter plots which indicate correlations between the intensities obtained from the whole blood (horizontal axis) and the neutrophil concentrations in each blood (vertical axis). Again clear linear correlations were found in both  $CL_{MCLA}$  (Fig 5C,  $R = 0.991$ ) and  $FL_{APF}$  (Fig 5D,  $R = 0.993$ ). Then, by measuring neutrophil concentrations in the blood samples, we adjusted the intensities obtained from  $1 \times 10^4$  cells of the isolated neutrophils (vertical axes in Fig 5A and 5B) to those from the corresponding cell counts in each blood sample

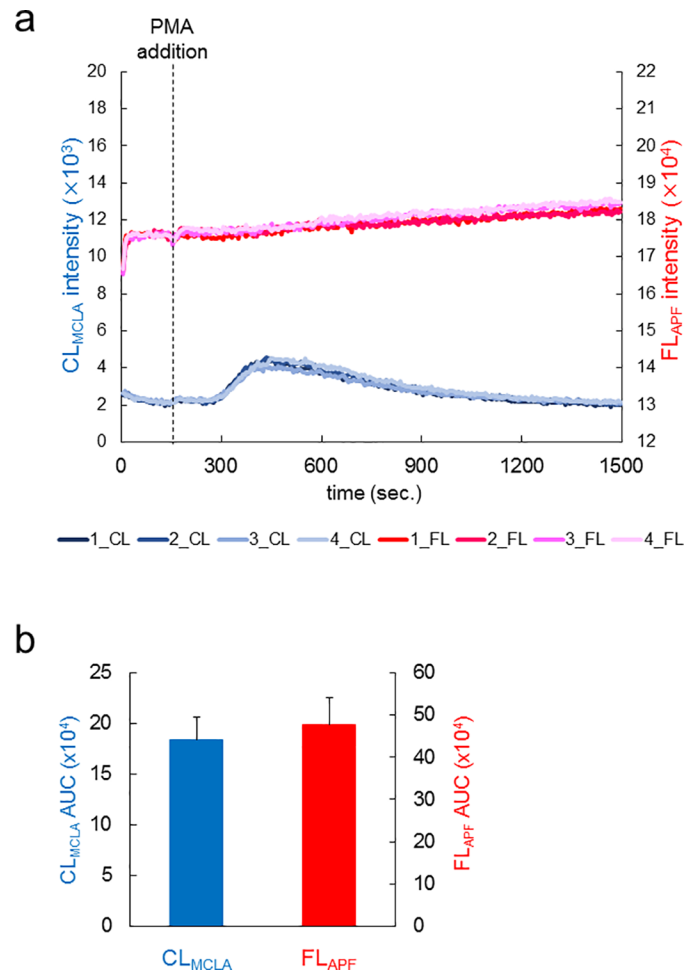

**Fig 4. Reproducibility of  $CL_{MCLA}$  and  $FL_{APF}$  measurements in blood samples.** (a) Time courses of  $CL_{MCLA}$  and  $FL_{APF}$  signals from blood samples in four independent experiments. CFL-P2200 was used for the measurements. The light colors indicate that the order of the measurement was later. The left vertical axis shows  $CL_{MCLA}$  intensity; the right vertical axis,  $FL_{APF}$  intensity. PMA was added at 150 second (dotted line). The baseline heights of  $FL_{APF}$  signals were adjusted for making the four independent experiments start at the same level. (b) Calculated signal areas measured in (a). Increases in both  $CL_{MCLA}$  and  $FL_{APF}$  were determined by calculating AUCs. Relative errors of the four measurements were 7.06% for  $CL_{MCLA}$  and 7.94% for  $FL_{APF}$ .

<https://doi.org/10.1371/journal.pone.0200573.g004>

(vertical axes in Fig 5E and 5F). Evidently, the most predominant correlations were found in both  $CL_{MCLA}$  (Fig 5E,  $R = 0.996$ ) and  $FL_{APF}$  (Fig 5F,  $R = 0.999$ ).

Finally, we supplemented the blood samples with increasing concentrations of freshly isolated neutrophils to find out whether or not the signals of  $CL_{MCLA}$  and  $FL_{APF}$  are linear across different neutrophil concentrations (S5 Fig). If there are potential interfering factors in the blood samples, linear responses of isolated neutrophils will not be obtained in our measurement. The result shows that there are clear linear correlations in both  $CL_{MCLA}$  (S5 Fig,  $R = 0.995$ ) and  $FL_{APF}$  (S5 Fig,  $R = 0.970$ ).

### The effects of diet and exercise on $CL_{MCLA}$ and $FL_{APF}$ of a tiny amount of whole blood: A pilot study of oxidative stress in volunteers

The ROS/hROS dual monitoring system we have developed may be applicable to evaluations of various factors affecting the  $O_2^{\cdot -}$  generation and the MPO activity in blood. To address this

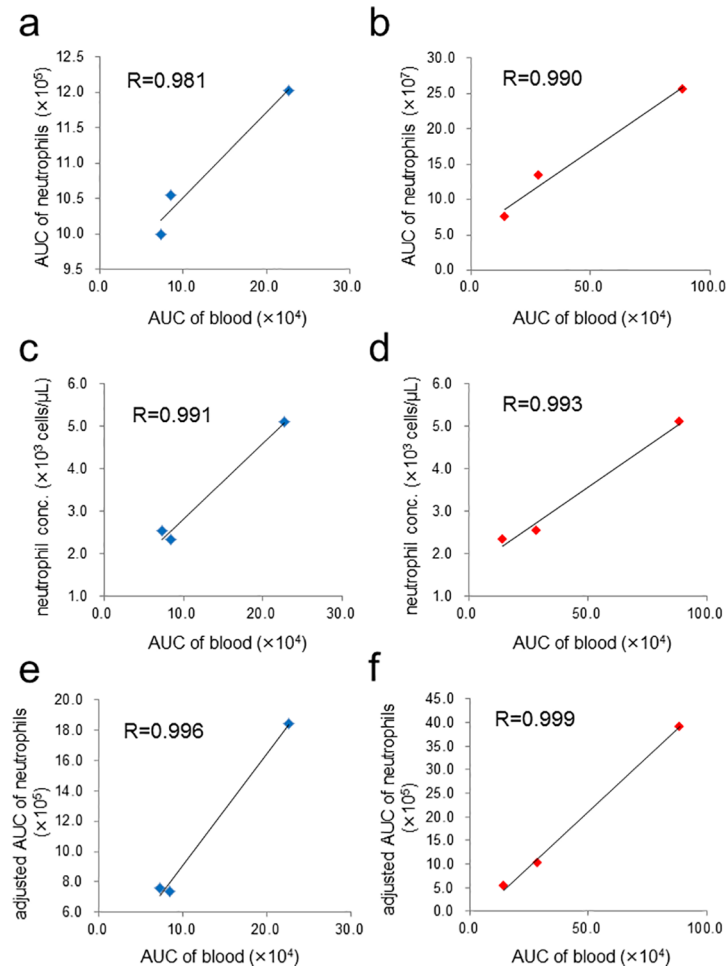

**Fig 5. Correlations of the data sets of blood from 3 healthy volunteers.** (a) Scatter plot showing a very strong positive correlation between the AUCs of  $CL_{MCLA}$  from 3  $\mu$ l of whole blood (horizontal axis) and those from  $1 \times 10^4$  cells of isolated neutrophils (vertical axis). (b) Scatter plot similarly obtained as in (a) with  $FL_{APF}$  intensities. (c) Scatter plot showing a very strong positive correlation between the AUCs of  $CL_{MCLA}$  from 3  $\mu$ l of whole blood (horizontal axis) and the neutrophil concentrations in whole blood (vertical axis). (d) Scatter plot obtained as described in (c) except that the horizontal axis is the AUCs of  $FL_{APF}$  from 3  $\mu$ l of whole blood. (e) Scatter plot showing a very strong positive correlation between the AUCs of  $CL_{MCLA}$  from 3  $\mu$ l of whole blood (horizontal axis) and those from isolated neutrophils normalized by neutrophil counts in 3  $\mu$ l of each blood (vertical axis). (f) Scatter plot obtained as described in (e) except that the horizontal axis is the AUCs of  $FL_{APF}$  intensities. CFL-P2200 was used for the monitoring of luminescence signals and Pentra MS CRP was used for measuring neutrophil concentrations in blood.

<https://doi.org/10.1371/journal.pone.0200573.g005>

possibility, we studied the effect of diet and exercise on ROS/hROS in volunteers' blood. Foods and supplements containing anti-oxidative compounds are expected to countervail ROS induced by over-activation in WBC [10,11,22,23]. In addition, the activity of MPO is known to be affected by various factors including exercise [24–27], aging [28,29], alcohol [30] and smoking [31]. We chose diet (i.e., food intake) and exercise among them since these are regarded as two of the most influential factors in our daily life.

First, we compared ROS ( $CL_{MCLA}$ ) and hROS ( $FL_{APF}$ ) before and after diet for 5 consecutive days. The blood sampling times were (1) at the end of fasting for more than 12 hours (around 7:30) and (2) within an hour after lunch (around 13:00). Lunch menus were not fixed during the experiment. Panels a (the end of fasting) and b (after lunch) in S6 Fig show day-to-day variations of  $CL_{MCLA}$  (blue), the  $FL_{APF}$  (red) and the neutrophil concentration (green).

Panels c and d in [S6 Fig](#) show scatter plots which indicate correlations between the intensity of  $CL_{MCLA}$  or  $FL_{APF}$  (horizontal axis, blue:  $CL_{MCLA}$ , red:  $FL_{APF}$ ) and the neutrophil concentration in blood (vertical axis). Fasting resulted in significant linear correlations in both  $CL_{MCLA}$  ( $R = 0.866$ ) and  $FL_{APF}$  ( $R = 0.953$ ) (Panel c in [S6 Fig](#)). In contrast, just after food intakes correlations became slightly poor in both  $CL_{MCLA}$  ( $R = 0.412$ ) and  $FL_{APF}$  ( $R = 0.634$ ) (Panel d in [S6 Fig](#)). To confirm the reproducibility of the decrease in the correlation coefficients, we conducted a similar analysis with another healthy volunteer for arbitrary 8 days (within 3 weeks). The blood sampling times were (1) at the end of fasting for more than 12 hours (around 10:00) and (2) within an hour after lunch (around 13:00). Similarly, after food intake, significant linear correlations decreased in both  $CL_{MCLA}$  ( $R = 0.856$  to  $0.477$ ) and  $FL_{APF}$  ( $R = 0.844$  to  $0.512$ ) (Panels e and f in [S6 Fig](#)).

Next we tested the blood ROS/hROS just before and just after exercise (within 10 minutes) for 5 consecutive days. This experiment was carried out in a hunger condition (more than 12 hours of fasting). At about the same time during these 5 days, the volunteer rode a bicycle, as exercise, in the same route for about 20 minutes. The cardiac rate and the blood pressure always showed higher values just after exercise. [S7 Fig](#) shows correlations between the intensity of  $CL_{MCLA}$  or  $FL_{APF}$  and the neutrophil concentration in blood. Before exercise, significant linear correlations were noticed in both  $CL_{MCLA}$  ( $R = 0.866$ ) and  $FL_{APF}$  ( $R = 0.953$ ) (Panel a in [S7 Fig](#)). After exercise, correlations decreased in both  $CL_{MCLA}$  ( $R = 0.584$ ) and  $FL_{APF}$  ( $R = 0.150$ ) (Panel b in [S7 Fig](#)).

## Discussion

By retaining the optical configuration of the previous ROS/intracellular  $Ca^{2+}$  dual monitoring system (CFL-C2000) [10,11] and by improving all other parts of the system, we have developed a new system aiming at measuring the oxidative stress in whole blood easily and accurately. For fulfilling that purpose, the new system is optimized for simultaneously detecting ROS and hROS, elicited mostly by WBC in a tiny amount of blood. Moreover, the system is now able to measure those signals stably for a very long time by an efficient air-flow stirring without evaporating blood samples.

The CL probe, MCLA, is commonly used for detecting one of ROS,  $O_2^{\cdot-}$  [12,13]. It is known to be auto-oxidized and be releasing a nonspecific weak CL, which is not inhibited by SOD [16,18]. It is also known to be reacting with singlet oxygen ( $^1O_2$ ), which is not scavenged by SOD [17]. The FL probes, APF and HPF, are also widely used for detecting hROS [14]. APF is known to be oxidized by  $OCl^-$ , hydroxyl radical ( $^{\cdot}OH$ ) and peroxynitrite ( $ONOO^-$ ), releasing a fluorescent molecule fluorescein, while HPF is only oxidized by  $^{\cdot}OH$  and  $ONOO^-$ , releasing the same molecule, fluorescein [14]. Therefore,  $OCl^-$  can be detected by APF and HPF in combination [14].

Our results obtained by this new ROS/hROS dual monitoring system (CFL-P2200) show at least four important findings. First, the experiments on modifying  $O_2^{\cdot-}$  concentrations (Figs 2A and 3A and Panel a in [S4 Fig](#)) showed that  $CL_{MCLA}$  corresponded to  $O_2^{\cdot-}$ . In particular, the finding that  $O_2^{\cdot-}$  scavenging by SOD inhibited most of  $CL_{MCLA}$  clearly shows that ROS generated by neutrophils, neutrophil-like cultured cells and whole blood were mostly  $O_2^{\cdot-}$ .

Second, the two types of stimulants, fMLP and PMA, activated those cells in quite different time courses (Figs 2A and 3A). The start time of  $O_2^{\cdot-}$  releasing from PMA-stimulated cells was more delayed than that from fMLP. Also, the  $O_2^{\cdot-}$  generating period of PMA-stimulated cells was much longer than that of fMLP. A probable explanation is that these stimulants differently affected protein kinase C, which in turn activated NADPH oxidase for  $O_2^{\cdot-}$  generation [32, 33].

Third, we found that ABAH decreased  $FL_{APF}$  in isolated neutrophils (Fig 2B) and sodium hypochlorite solution increased  $FL_{APF}$  (Panel b in S4 Fig) in dose dependent manners. In addition, the increase of  $FL_{HPF}$  was considerably smaller than that of  $FL_{APF}$  (S3 Fig). These results show that the majority of hROS generated by isolated neutrophils were  $OCl^-$ . Even when whole blood samples were used, the time derivative of  $FL_{APF}$  revealed that the increase of  $FL_{APF}$  began later than that of  $CL_{MCLA}$  (Fig 3A) and ABAH appreciably inhibited  $FL_{APF}$  (Fig 3), whereas  $FL_{HPF}$  was not inhibited by ABAH (data not shown). This shows that even in whole blood,  $FL_{APF}$  was mostly derived from  $OCl^-$  produced by MPO. However, in the case of blood, there may be more factors contributing to  $FL_{APF}$ , such as yet unidentified hROS sources or some unknown artifacts.

Fourth, the generation of hROS, mostly  $OCl^-$ , was found to be a slower process than the  $O_2^{\cdot-}$  generation. Since instantaneous hROS generation is proportional to the time derivative of FL (i.e.,  $dFL/dt$ ), the  $dFL_{APF}/dt$  curve of neutrophil-like cells in Fig 2B clarified that the hROS generation started at about 400 seconds after stimulation (data not shown), and it is later than the peak of the  $O_2^{\cdot-}$  generation which was clearly before 400 seconds ( $CL_{MCLA}$  curve in Fig 2A). This may be explained by the fact that  $OCl^-$  is a product of the reaction of  $O_2^{\cdot-}$  catalyzed by MPO.

Since the results obtained with whole blood seem to be more complicated than those obtained with isolated cells, we tried to identify the responsible blood cells generating  $O_2^{\cdot-}$  and  $OCl^-$ . Results of Fig 5 suggest that the luminescence signals were derived largely from the neutrophils in whole blood we used so far. In fact, both  $CL_{MCLA}$  and  $FL_{APF}$  were proportional to the counts of neutrophils added to the blood samples (S5 Fig), which enabled us to estimate the CL/FL intensity attributable to the neutrophil count. This was found to be about 90% of the total CL/FL observed. The residual 10% of CL/FL not attributable to neutrophils may include not yet identified hROS sources and/or some unknown artifacts.

Although measuring WBC counts has become quite easy by using commercially available devices, such counts cannot directly reveal ROS generation. Many reports suggested that excess amount of ROS by over-activated WBC are linked to various disorders [4,5]. It is also reported that ROS generation can be modified by some factors such as diet and exercise [10,11,24–27], which was also shown by our results (S6 and S7 Fig). Therefore, it would be very important to develop a method for detecting ROS directly. For this purpose, isolated neutrophils have so far been used in many studies [24]. However, neutrophil isolation requires several steps and at least a few milliliters of blood. In addition, the procedures might cause stress on neutrophils prior to measurement. Moreover, behavior of neutrophils in blood might be different from that of isolated neutrophils. Since the present system can measure ROS/hROS in whole blood, these drawbacks would be eliminated. Further, it may be able to monitor other types of cells (such as monocytes) in situations caused by some diseases [34]. In order to prevent such diseases caused by oxidative stress and improve individual physical conditions, it would also be important to detect an imbalance of oxidative states *in vivo* at early stages.

As the new system enabled  $O_2^{\cdot-}/OCl^-$  dual monitoring in whole blood, we conducted a pilot study on the effects of diet and exercise on generated  $O_2^{\cdot-}$  and  $OCl^-$  as indicators of oxidative stress. The results show that the correlations between the ROS generation and the neutrophil concentrations were decreased after diet (S6 Fig) and exercise (S7 Fig), which may suggest that the neutrophil counts cannot reveal the whole picture of the oxidative stress. Therefore, the present system may be applicable to cases in which neutrophil counts do not change appreciably. Results in S6 Fig may indicate that some kinds of functional compounds in food interacted with the oxidative substances contained in the blood and/or modulated the  $O_2^{\cdot-}/OCl^-$  generation of circulating neutrophils. Results in S7 Fig may also suggest that exercise modulated  $O_2^{\cdot-}/OCl^-$  generation of circulating neutrophils [26] and/or induced enhancement of

plasma antioxidant activity [27], depending on a day-to-day variance in the physical conditions. Further studies by increased number of subjects, fixed diet/quantitated exercise are important in the future.

Recently, various biomarkers for excess activities of MPO were developed [35–37]. They are good indicators to disease symptoms, which can be regarded as “products” of oxidative stress. On the other hand, what our system can evaluate is ROS and hROS generation, which can be regarded as “substrates” of oxidative stress. Therefore, combining such biomarkers and the present system may reveal the mechanisms and processes of oxidative stress in more detail. We are also planning to clarify detailed relationships between some disorders and ROS/hROS generation.

Another advantage of this system is that it is readily designed to monitor not only blood samples but also various types of cells including adhesive cells. Although we were able to measure  $O_2^{\cdot -}$  generation from floated cultured neurons by using the previous cuvette-type system [38], the present system can do it more easily and effectively. Moreover, since the new system is very sensitive to the optical signals, it may also be applicable to cells not actively producing ROS, such as muscle cells and neurons. Further, this system may be applicable to measurements of more than two luminescence signals simultaneously from various suspension samples including non-biological materials. In spite of these advantages, more improvements are still possible and practical, such as auto-adjustment of air flows and automatic handling of liquids and blood samples. Therefore, we are also hoping to make it even easier to operate so that it can publicly be accessible at various facilities such as citizen centers, drug stores and gyms in order to help people select suitable anti-oxidative foods or evaluate daily physical conditions for preventing diseases.

## Supporting information

### **S1 Fig. Schematic diagrams for comparing the measurement principles of CFL-C2000 and CFL-P2200.**

(a) Schematic diagrams illustrating the measurement principle of CFL-C2000. The left diagram shows the top view of the system, the right panel, a side view of the system. The system used the cuvette as a sample container for cultured neutrophil-like cells. LED (excitation light) was placed at a right angle of the photodetector on the same side. (b) Schematic diagram illustrating the measurement principle of CFL-P2200. A sample mixture containing blood was spread over a wide area on the glass slide to make the optical pass length as short as possible. Two LEDs (excitation lights) were placed at the photodetector side (luminescence signals) to minimize light absorptions in whole blood.

(TIF)

### **S2 Fig. Actual images of blood samples on the custom ordered double-well slide glass before and after measurements.**

(a) Blood samples on a dedicated slide glass just before measurement. The samples containing whole blood were mixed with gentle pipetting prior to measurement. (b) Blood samples on the glass slide just after measurement using CFL-P2200. Air flows were used for diffusing stimulants dropped into the blood samples and for preventing blood cells from aggregation. (c) Blood samples on the glass slide with insufficient stirring by weaker air flows, showing that the blood components were clumped in the bottom of the wells.

(TIF)

### **S3 Fig. Fluorescence signals of HPF or APF from suspensions of isolated neutrophils.**

Time courses of the fluorescence signals of HPF (blue) or APF (orange). The net increases of both  $FL_{HPF}$  ( $\Delta HPF$ ) and  $FL_{APF}$  ( $\Delta APF$ ) obtained by subtracting the intensity of vehicle from that of PMA stimulated neutrophils were plotted. PMA or the corresponding amount of vehicle was

added at 350 second (dotted line). CFL-P2200 was used for the measurements.  
(TIF)

**S4 Fig. Selectivity of MCLA and APF using the newly developed system.** (a) Column charts showing the selectivity of MCLA, which was used as a CL probe in this study. The vertical axis indicates the  $CL_{MCLA}$  AUCs and the horizontal rows, as follows: Column 1: xanthine oxidase (67 units) was injected to the sample containing no blood but 0.1 nM hypoxanthine. Column 2: RH buffer was injected to the sample containing blood but no hypoxanthine. Column 3: xanthine oxidase (67 units) was injected to the sample containing blood but no hypoxanthine. Columns 4 and 5: xanthine oxidase (67 units) was injected to the samples containing both blood and different concentrations of hypoxanthine (0.1 or 0.2 nM). (b) Scatter plot showing the selectivity of APF, which was used as an FL probe in this study.  $OCI^-$  was independently increased in the blood samples by injecting different concentrations of sodium hypochlorite solution (relative concentrations:  $\times 1$ ,  $\times 3.3$ ,  $\times 10$ ,  $\times 33$ ,  $\times 100$ ,  $\times 330$ ). The vertical axis indicates the  $FL_{APF}$  AUCs and the horizontal axis, relative concentrations of injected sodium hypochlorite solution. The  $FL_{APF}$  signals were increased in a dose dependent manner ( $R = 0.998$ ). CFL-P2200 was used for the measurements.

(TIF)

**S5 Fig. Evaluation of the linearity of the signals of  $CL_{MCLA}$  and  $FL_{APF}$  across different neutrophil concentrations.** Scatter plot showing that the luminescence signals were linear across different neutrophil concentrations in blood. CFL-P2200 was used for the measurements. The vertical axes indicate the  $CL_{MCLA}$  AUCs (a) and the  $FL_{APF}$  AUCs (b). Blood samples were supplemented with various counts of freshly isolated neutrophils (horizontal axis). Clear linear correlations were found in both  $CL_{MCLA}$  ( $R = 0.995$ ) and  $FL_{APF}$  ( $R = 0.970$ ).

(TIF)

**S6 Fig. Effects of diet on  $CL_{MCLA}$  and  $FL_{APF}$  in whole blood.** (a) Daily variations of the  $CL_{MCLA}$  AUCs (blue), the  $FL_{APF}$  AUCs (red) and the neutrophil concentration (green) before diet. The left vertical axis indicates  $CL_{MCLA}$  and  $FL_{APF}$  AUCs. The right vertical axis indicates neutrophil concentrations in whole blood. Blood was collected from a healthy volunteer and measured at the same time on 5 consecutive days (horizontal axis). (b) Daily variations of them obtained as described in (a) after diet. (c) Superimposed scatter plots showing correlations between the AUCs of  $CL_{MCLA}$  (blue) or  $FL_{APF}$  (red) and the neutrophil concentrations in 3  $\mu$ l of whole blood before diet. The original data obtained were in (a). (d) Scatter plots after diet. The data was obtained as described in (c). The original data obtained were in (b). (e) Scatter plots derived from the data of another healthy volunteer. The data were obtained as described in (c). Blood were collected and measured for arbitrary 8 days (within 3 weeks) before diet. (f) Scatter plots after diet. The data were obtained as described in (e). CFL-P2200 was used for the monitoring of luminescence signals and Pentra MS CRP was used for measuring neutrophil concentrations in blood.

(TIF)

**S7 Fig. Effects of exercise on  $CL_{MCLA}$  and  $FL_{APF}$  in whole blood.** (a) Scatter plots showing correlations between the AUCs of  $CL_{MCLA}$  (blue) or  $FL_{APF}$  (red) and the neutrophil concentrations in 3  $\mu$ l of whole blood before exercise. Blood samples were collected and measured for 5 consecutive days from a healthy volunteer. Original data were obtained in Panel a in [S6 Fig.](#) (b) Scatter plots after exercise. The data were obtained as described in (a). CFL-P2200 was used for monitoring luminescence signals and Pentra MS CRP was used for measuring neutrophil concentrations in blood.

(TIF)

**S1 Table. Scheme showing the procedure to measure blood samples by using CFL-P2200.**

The first column in the table shows the reagents in the reaction mixture and the second column shows the stock concentrations of each reagent. The reaction mixture were prepared and measured on the dedicated glass slide and obtained data were analyzed according to the steps 1–11 on the lower side in the table.

(TIF)

**S1 Movie. Visualization of the air-flow stirring process of the newly developed system.** The movie shows how dropped blue ink into a measuring sample on the glass slide is diffused. The ink was fully diffused in about 2 seconds (see also [Fig 1B](#)).

(MP4)

## Acknowledgments

The authors are grateful to Drs. Shigeru Hosoi and Hiroyasu Itoh for their kind discussions and Dr. Hiroshi Satozono for helping us create [Fig 1A](#). We also thank Ms. Yukiko Hatano for technical assistance.

## Author Contributions

**Conceptualization:** Kimiko Kazumura, Hiroshi Tsuchiya, Toshihiko Osawa.

**Data curation:** Kimiko Kazumura, Kozo Takeuchi, Akiko Hara.

**Formal analysis:** Kimiko Kazumura, Kozo Takeuchi, Akiko Hara.

**Funding acquisition:** Kimiko Kazumura.

**Investigation:** Kimiko Kazumura, Kozo Takeuchi, Akiko Hara, Hiroshi Tsuchiya.

**Methodology:** Kimiko Kazumura, Akiko Hara, Toshiyuki Miwa, Masaki Hattori, Yuqiu Wu, Naokazu Morishita, Hiroshi Tsuchiya.

**Project administration:** Kimiko Kazumura, Toshihiko Osawa.

**Resources:** Kimiko Kazumura, Toshiyuki Miwa, Masaki Hattori, Naokazu Morishita, Hiroshi Tsuchiya.

**Software:** Kimiko Kazumura, Akiko Hara, Toshiyuki Miwa, Masaki Hattori, Hiroshi Tsuchiya.

**Supervision:** Kimiko Kazumura.

**Validation:** Kimiko Kazumura, Kozo Takeuchi, Akiko Hara.

**Visualization:** Kimiko Kazumura, Kozo Takeuchi, Akiko Hara, Toshiyuki Miwa.

**Writing – original draft:** Kimiko Kazumura, Kozo Takeuchi.

**Writing – review & editing:** Kimiko Kazumura, Kozo Takeuchi.

## References

1. Sies H. Oxidative stress: oxidants and antioxidants. *Exp Physiol*. 1997; 82, 291–295. PMID: [9129943](#)
2. Thannickal VJ, Fanburg BL. Reactive oxygen species in cell signaling. *Am J Physiol Lung Cell Mol Physiol*. 2000; 279: L1005–1028. <https://doi.org/10.1152/ajplung.2000.279.6.L1005> PMID: [11076791](#)
3. Sies H, Jones D. Oxidative stress. In: Fink G editor-in-chief. *Encyclopedia of Stress* (2nd ed.), Amsterdam: Elsevier; 2007. pp. 45–48.



4. Davies MJ, Hawkins CL, Pattison DI, Rees MD. Mammalian heme peroxidases: from molecular mechanisms to health implications. *Antioxid Redox Signal*. 2008; 10, 1199–1234. <https://doi.org/10.1089/ars.2007.1927> PMID: 18331199
5. van der Veen BS, de Winther MP, Heeringa P. Myeloperoxidase: molecular mechanisms of action and their relevance to human health and disease. *Antioxid Redox Signal*. 2009; 11, 2899–2937. <https://doi.org/10.1089/ARS.2009.2538> PMID: 19622015
6. Hampton MB, Kettle AJ, Winterbourn CC. Inside the neutrophil phagosome: oxidants, myeloperoxidase, and bacterial killing. *Blood*. 1998; 92, 3007–3017. PMID: 9787133
7. van Dalen CJ, Whitehouse MW, Winterbourn CC, Kettle AJ. Thiocyanate and chloride as competing substrates for myeloperoxidase. *Biochem J*. 1997; 327, 487–492. PMID: 9359420
8. Ishibashi K, Okazaki S, Hiramatsu M. Simultaneous measurement of superoxide generation and intracellular  $Ca^{2+}$  concentration reveals the effect of extracellular  $Ca^{2+}$  on rapid and transient contents of superoxide generation in differentiated THP-1 cells. *Biochem Biophys Res Commun*. 2006; 344, 571–580. <https://doi.org/10.1016/j.bbrc.2006.02.173> PMID: 16630555
9. Satozono H, Kazumura K, Okazaki S, Hiramatsu M. Simultaneous measurement of superoxide generation and intracellular calcium ion of neutrophil-like culture cells. *Luminescence*. 2006; 21, 69–71. <https://doi.org/10.1002/bio.882> PMID: 16100749
10. Kazumura K, Sato Y, Satozono H, Koike T, Tsuchiya H, Hiramatsu M, et al. Simultaneous monitoring of superoxides and intracellular calcium ions in neutrophils by chemiluminescence and fluorescence: evaluation of action mechanisms of bioactive compounds in foods. *J Pharm Biomed Anal*. 2013; 84, 90–96. <https://doi.org/10.1016/j.jpba.2013.05.048> PMID: 23810848
11. Kazumura K, Yoshida LS, Hara A, Tsuchiya H, Morishita N, Kawagishi H, et al. Inhibition of neutrophil superoxide generation by shikonin is associated with suppression of cellular  $Ca^{2+}$  fluxes. *J Clin Biochem Nutr*. 2016; 59, 1–9. <https://doi.org/10.3164/jcbn.16-4> PMID: 27499572
12. Nakano M. Assay for superoxide dismutase based on chemiluminescence of luciferin analog. *Methods Enzymol*. 1990; 186, 227–232. PMID: 2233294
13. Nakano M. Determination of superoxide radical and singlet oxygen based on chemiluminescence of luciferin analogs. *Methods Enzymol*. 1990; 186, 585–591. PMID: 2172717
14. Setsukinai K, Urano Y, Kakinuma K, Majima HJ, Nagano T. Development of novel fluorescence probes that can reliably detect reactive oxygen species and distinguish specific species. *J Biol Chem*. 2003; 278, 3170–3175. <https://doi.org/10.1074/jbc.M209264200> PMID: 12419811
15. Gallagher R, Collins S, Trujillo J, McCredie K, Ahearn M, Tsai S, et al. Characterization of the continuous, differentiating myeloid cell line (HL-60) from a patient with acute promyelocytic leukemia. *Blood*. 1979; 54, 713–733. PMID: 288488
16. Kimura H, Nakano M. Highly sensitive and reliable chemiluminescence method for the assay of superoxide dismutase in human erythrocytes. *FEBS Lett*. 1988; 239, 347–350. PMID: 2846362
17. Kimura C, Oike M, Koyama T, Ito Y. Impairment of endothelial nitric oxide production by acute glucose overload. *Am J Physiol Endocrinol Metab*. 2001; 280, E171–178. <https://doi.org/10.1152/ajpendo.2001.280.1.E171> PMID: 11120671
18. Midorikawa J, Maehara K, Yaoita H, Watanabe T, Ohtani H, Ushiroda S, et al. Continuous observation of superoxide generation in an in-situ ischemia-reperfusion rat lung model. *Jpn Circ J*. 2001; 65, 207–212. PMID: 11266196
19. Kettle AJ, Gedye CA, Hampton MB, Winterbourn CC. Inhibition of myeloperoxidase by benzoic acid hydrazides. *Biochem J*. 1995; 308, 559–563. PMID: 7772042
20. Kettle AJ, Gedye CA, Winterbourn CC. Mechanism of inactivation of myeloperoxidase by 4-aminobenzoic acid hydrazide. *Biochem J*. 1997; 321, 503–508. PMID: 9020887
21. Kambayashi Y, Ogino K. Reestimation of Cypridina luciferin analogs (MCLA) as a chemiluminescence probe to detect active oxygen species—cautionary note for use of MCLA. *J Toxicol Sci*. 2003; 28, 139–148. PMID: 12974606
22. Osawa T. Recent Progress of Functional Food Research in Japan. *Functional Foods for Disease Prevention II*. ACS Publications. 1998. pp. 2–9.
23. Alissa EM, Ferns GA. Functional foods and nutraceuticals in the primary prevention of cardiovascular diseases. *J Nutr Metab*. 2012; 2012, 569486; <https://doi.org/10.1155/2012/569486> PMID: 22570771
24. Peake J, Suzuki K. Neutrophil activation, antioxidant supplements and exercise-induced oxidative stress. *Exerc Immunol Rev*. 2004; 10, 129–141. PMID: 15633591
25. Popovic LM, Mitic NR, Miric D, Bisevac B, Miric M, Popovic B. Influence of vitamin C supplementation on oxidative stress and neutrophil inflammatory response in acute and regular exercise. *Oxid Med Cell Longev*. 2015; 2015, 295497; <https://doi.org/10.1155/2015/295497> PMID: 25802681

26. Suzuki K, Sato H, Kikuchi T, Abe T, Nakaji S, Sugawara K, Totsuka M, Sato K, Yamaya K. Capacity of circulating neutrophils to produce reactive oxygen species after exhaustive exercise. *J Appl Physiol*. 1996; 81, 1213–1222. <https://doi.org/10.1152/jappl.1996.81.3.1213> PMID: 8889756
27. Suzuki K, Nakaji S, Yamada M, Liu Q, Kurakake S, Okamura N, Kumae T, Umeda T, Sugawara K. Impact of a competitive marathon race on systemic cytokine and neutrophil responses. *Med Sci Sports Exerc*. 2003; 35, 348–355. <https://doi.org/10.1249/01.MSS.0000048861.57899.04> PMID: 12569227
28. Son TG, Zou Y, Yu BP, Lee J, Chung HY. Aging effect on myeloperoxidase in rat kidney and its modulation by calorie restriction. *Free Radic Res*. 2005; 39, 283–289. <https://doi.org/10.1080/10715760500053461> PMID: 15788232
29. Espino J, Bejarano I, Paredes SD, González D, Barriga C, Reiter RJ, et al. Melatonin counteracts alterations in oxidative metabolism and cell viability induced by intracellular calcium overload in human leucocytes: changes with age. *Basic Clin Pharmacol Toxicol*. 2010; 107, 590–597. <https://doi.org/10.1111/j.1742-7843.2010.00546.x> PMID: 20210792
30. Breitmeier D, Becker N, Weilbach C, Albrecht K, Scheinichen D, Panning B, et al. Ethanol-induced malfunction of neutrophils respiratory burst on patients suffering from alcohol dependence. *Alcohol Clin Exp Res*. 2008; 32, 1708–1713. <https://doi.org/10.1111/j.1530-0277.2008.00748.x> PMID: 18627360
31. Hunninghake GW, Gadek JE, Kawanami O, Ferrans VJ, Crystal RG. Inflammatory and immune processes in the human lung in health and disease: evaluation by bronchoalveolar lavage. *Am J Pathol*. 1979; 97, 149–206. PMID: 495693
32. Shirai Y, Saito N. Activation mechanisms of protein kinase C: maturation, catalytic activation, and targeting. *J Biochem*. 2002; 132, 663–668. PMID: 12417013
33. Shirai Y. Analysis of molecular mechanism regulating spatio-temporal localization and activity of protein kinase C and diacylglycerol kinase using live imaging. *Nihon Yakurigaku Zasshi*. 2004; 123, 189–196. PMID: 14993731
34. Watanabe T, Yasunari K, Nakamura M, Maeda K. Carotid artery intima-media thickness and reactive oxygen species formation by monocytes in hypertensive patients. *J Hum Hypertens*. 2006; 20, 336–340. <https://doi.org/10.1038/sj.jhh.1001990> PMID: 16467862
35. Kato Y. Neutrophil myeloperoxidase and its substrates: formation of specific markers and reactive compounds during inflammation. *J Clin Biochem Nutr*. 2016; 58, 99–104. <https://doi.org/10.3164/jcbs.15-104> PMID: 27013775
36. Asahi T, Kondo H, Masuda M, Nishino H, Aratani Y, Naito Y, et al. Chemical and immunochemical detection of 8-halogenated deoxyguanosines at early stage inflammation. *J Biol Chem*. 2010; 285, 9282–9291. <https://doi.org/10.1074/jbc.M109.054213> PMID: 20081197
37. Suzuki K. Exhaustive exercise-induced neutrophil-associated tissue damage and possibility of its prevention. *J Nanomedicine Biotherapeutic Discov*. 2017; 7. <https://doi.org/10.4172/2155-983X.1000156>
38. Wu Y, Kazumura K, Maruyama W, Osawa T, Naoi M. Rasagiline and selegiline suppress calcium efflux from mitochondria by PK11195-induced opening of mitochondrial permeability transition pore: a novel anti-apoptotic function for neuroprotection. *J Neural Transm*. 2015; 122, 1399–1407. <https://doi.org/10.1007/s00702-015-1398-0> PMID: 25863936
